# Supplementary material
Source: Research Square preprint supplement (doi:10.21203/rs.3.rs-8457290/v1)

## APPENDIX

#### APPENDIX (1)

**المجلس القومي للتخصصات الطبية مجلس التخدير والعناية المكثفة**

بحث :**المقارنة بين التغيرات في الدورة الدموية في العمليات القيصرية تحت التخدير النصفي العادي** **والقطاعي**

**بيان الباحث**

أنا الباحث **د. عبدالقادر محمد**، نائب اختصاصي تخدير – المجلس القومي السوداني للتخصصات الطبية، هاتف **249127456514**. :أطلب منكم المشاركة في دراسة بحثية بعنوان:

##### "المقارنة بين التغيرات في الدورة الدموية في العمليات القيصرية تحت التخدير النصفي العادي والقطاعي."

ويمكنكم طرح أي أسئلة حول هدف البحث أو حقوقكم كمشاركات قبل اتخاذ القرار.

##### الغرض من الدراسة:

تهدف هذه الدراسة إلى مقارنة التغيرات في الدورة الدموية لدى الحوامل خلال العمليات القيصرية التي تُجرى تحت التخدير النصفي العادي مقابل التخدير النصفي القطاعي في السودان.

##### إجراءات الدراسة:

إذا قررتِ المشاركة، فسيتم إجراء مقابلة قصيرة تشمل مجموعة من الأسئلة المتعلقة بالحالة الصحية ونوع

التخدير، وتستغرق حوالي **5إلى 10 دقائق** فقط. ولن يتم إجراء أي تدخلات إضافية غير الإجراءات

الروتينية المتبعة خلال العملية.

##### السرية:

جميع المعلومات التي يتم جمعها ستكون سرية تمامًا، ولن يُذكر اسم المريضة في أي مرحلة من مراحل البحث أو النشر العلمي. ستُستخدم البيانات لأغراض البحث العلمي فقط، مع استبدال الأسماء بأرقام ترميزية.

##### الفوائد:

لا توجد فوائد مادية أو شخصية مباشرة للمشاركة، لكن نتائج الدراسة قد تسهم في تحسين ممارسات التخدير والعناية بالحوامل مستقبلًا.

##### المخاطر:

لا توجد مخاطر إضافية محتملة، فالدراسة تعتمد على المتابعة والملاحظة فقط دون أي تدخل علاجي أو إجراء غير روتيني.

##### حقوق المشاركة:

المشاركة اختيارية بالكامل، وللمريضة الحق في الانسحاب في أي وقت دون أي تأثير على الرعاية الطبية المقدمة لها.

توقيع الباحث.............................................. : الاسم :**د. عبدالقادر محمد**

التاريخ: ...... / ...... / 2025

**APPENDIX (2)**


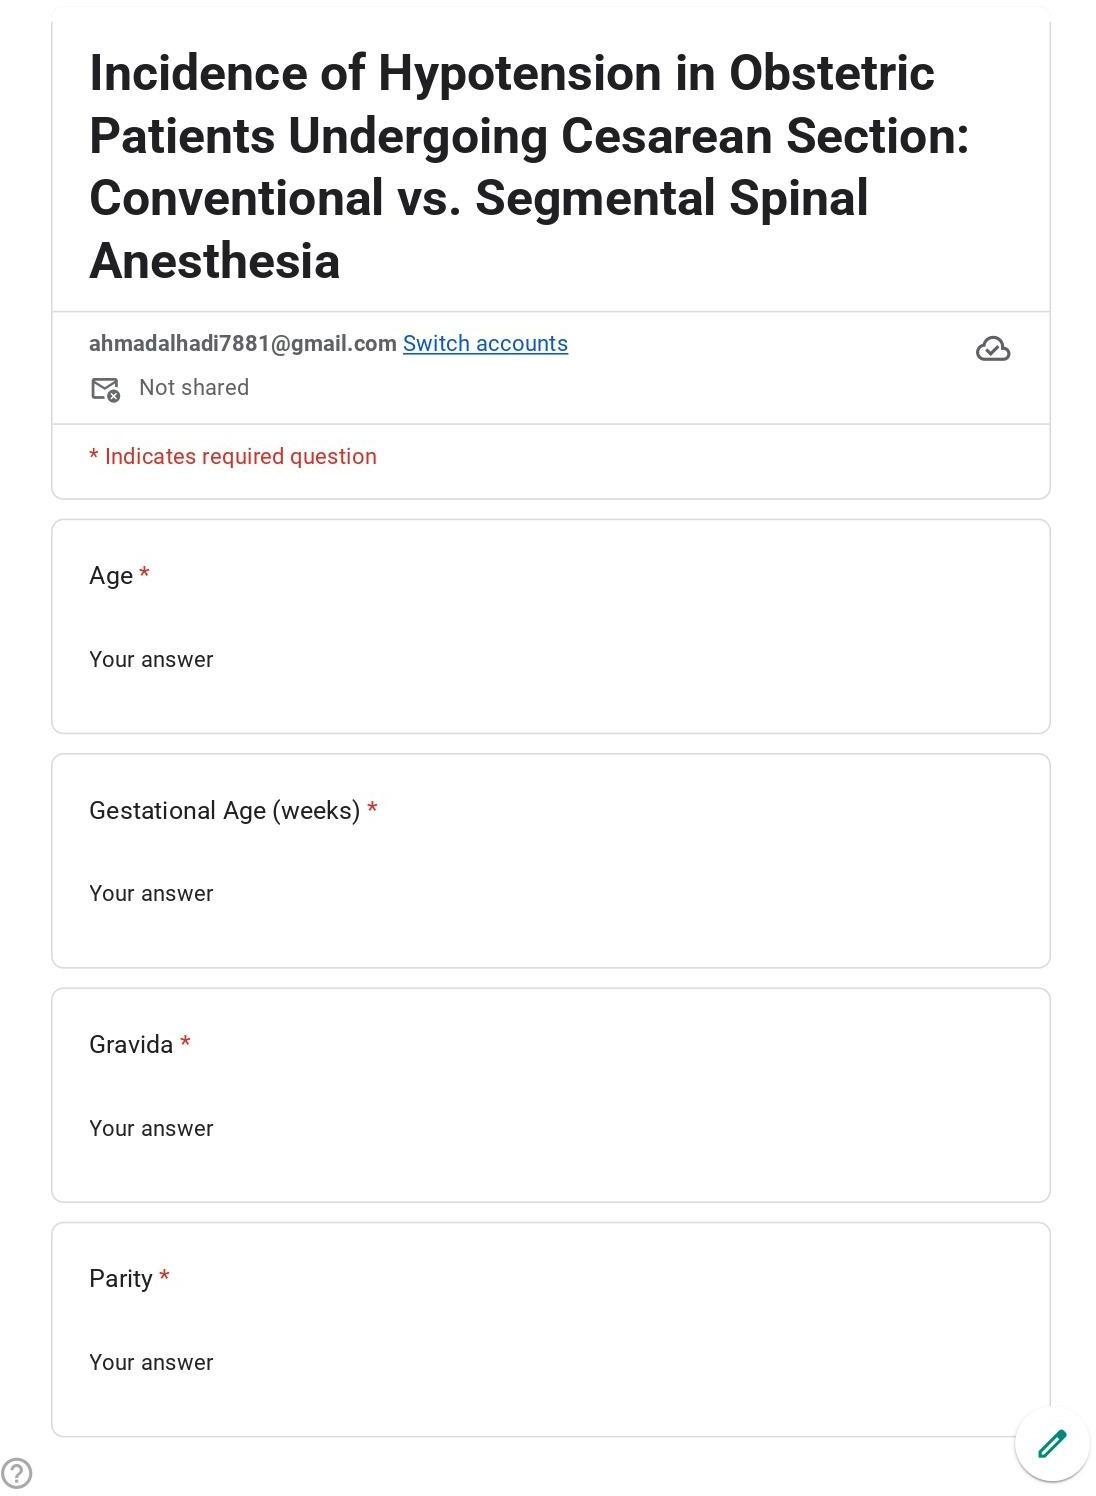


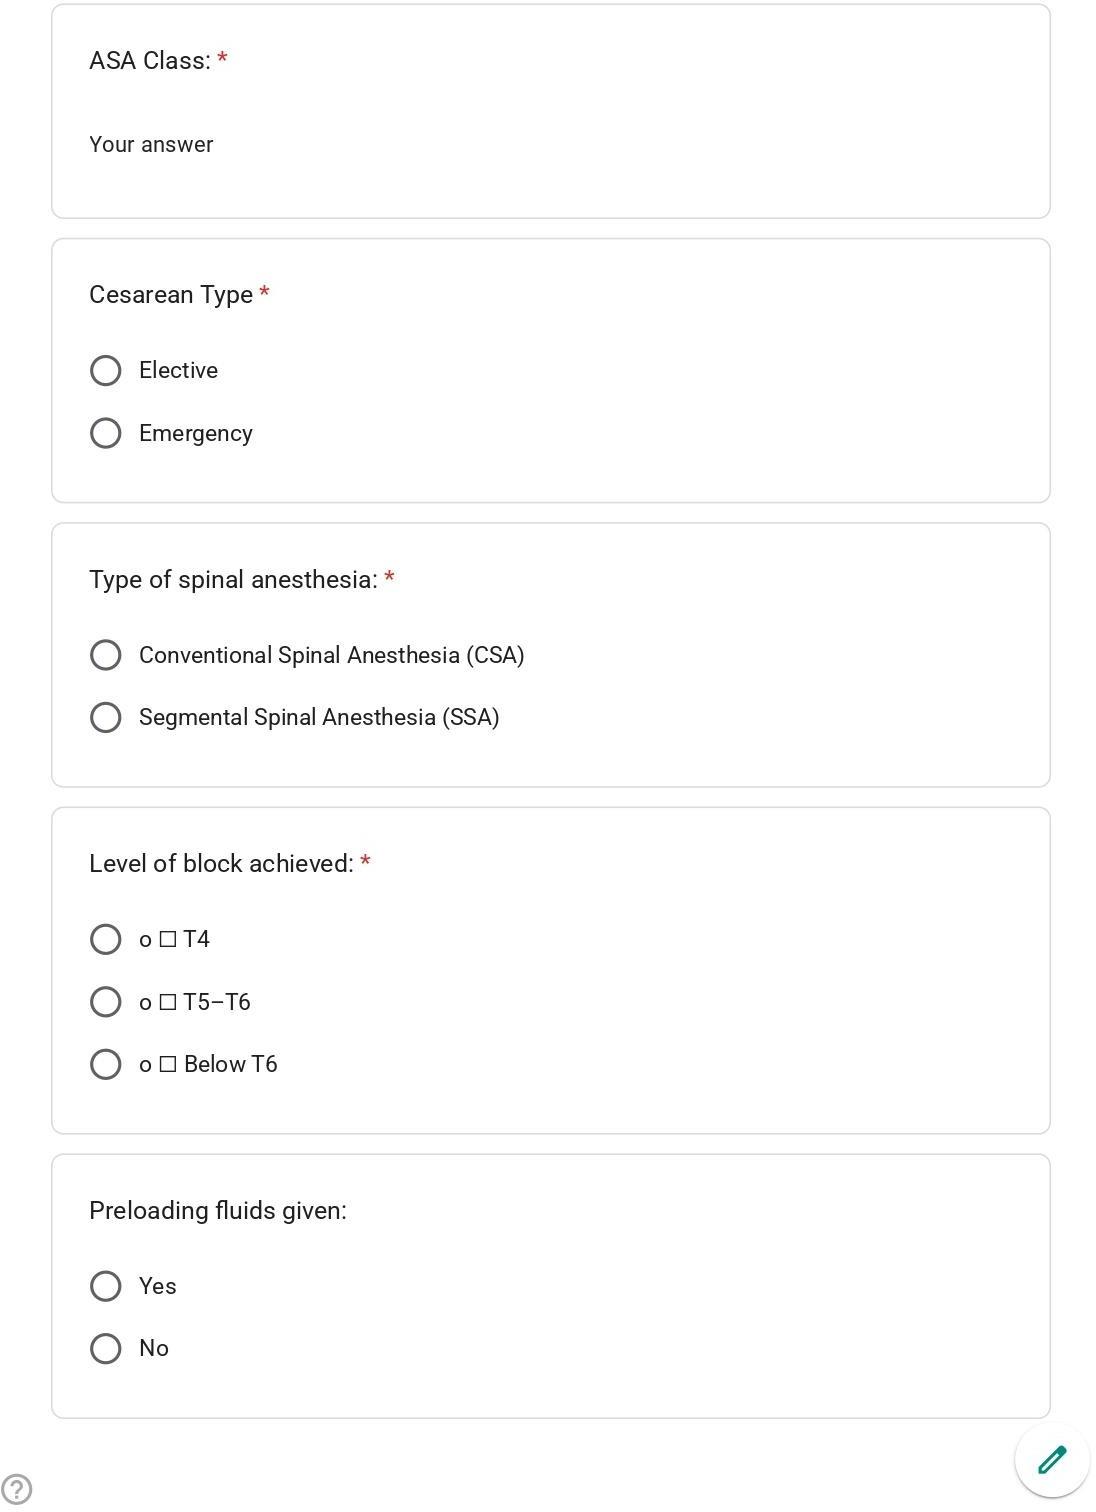


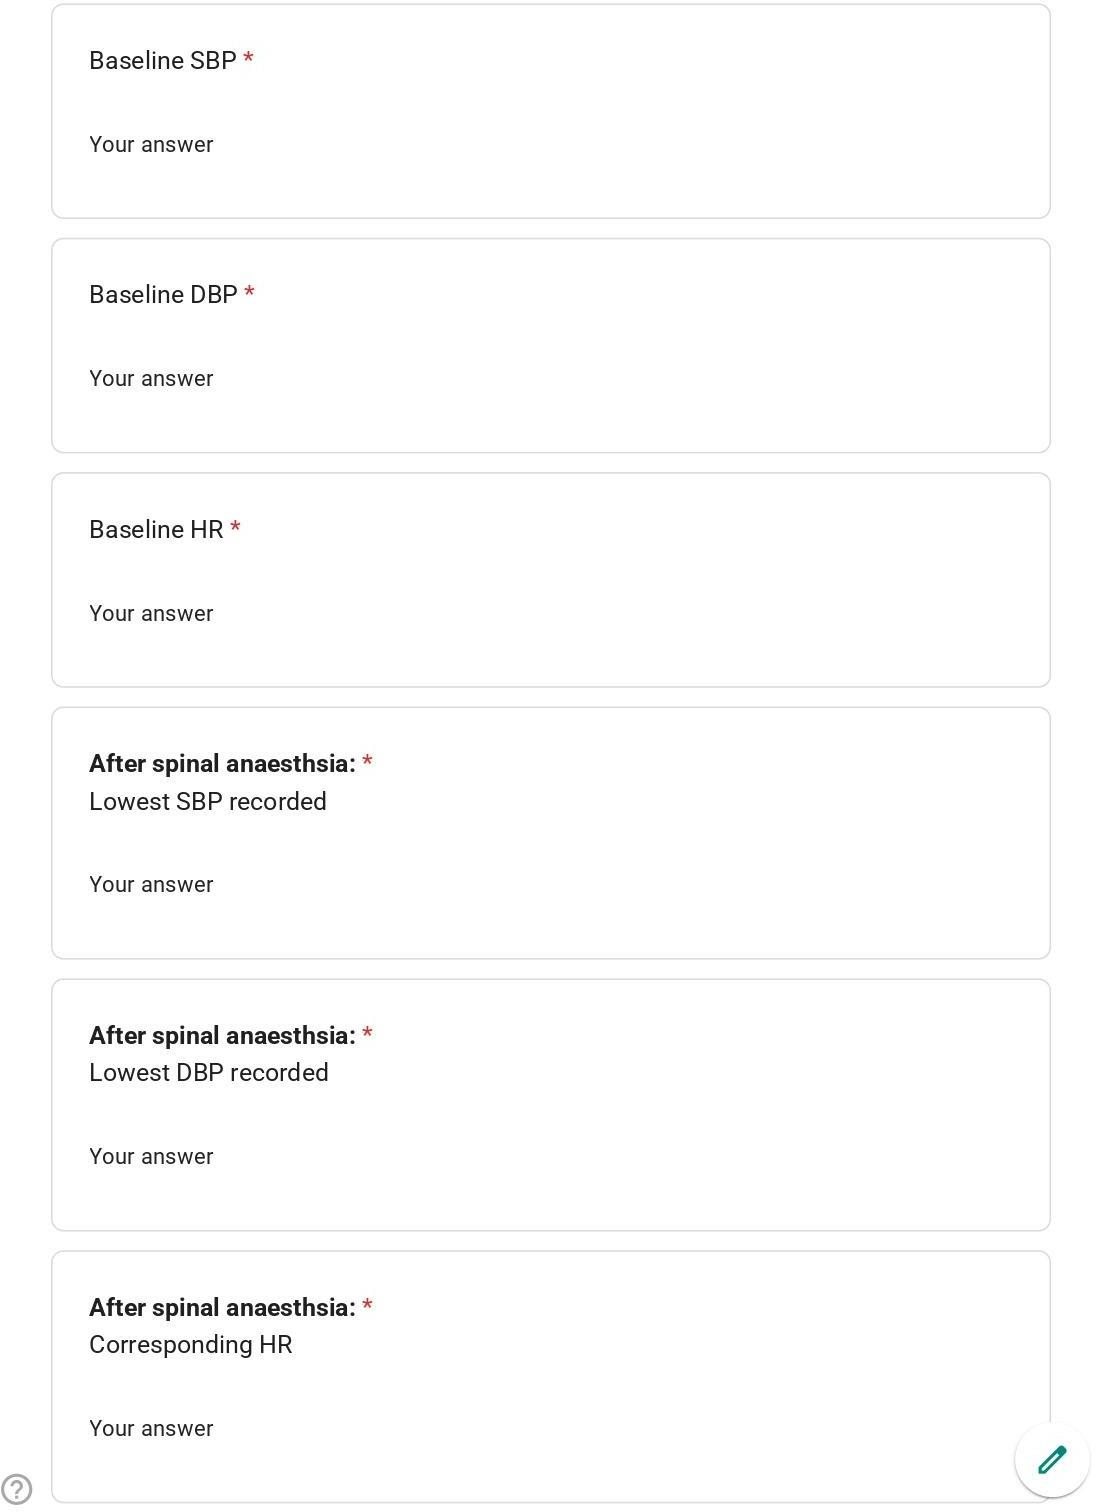


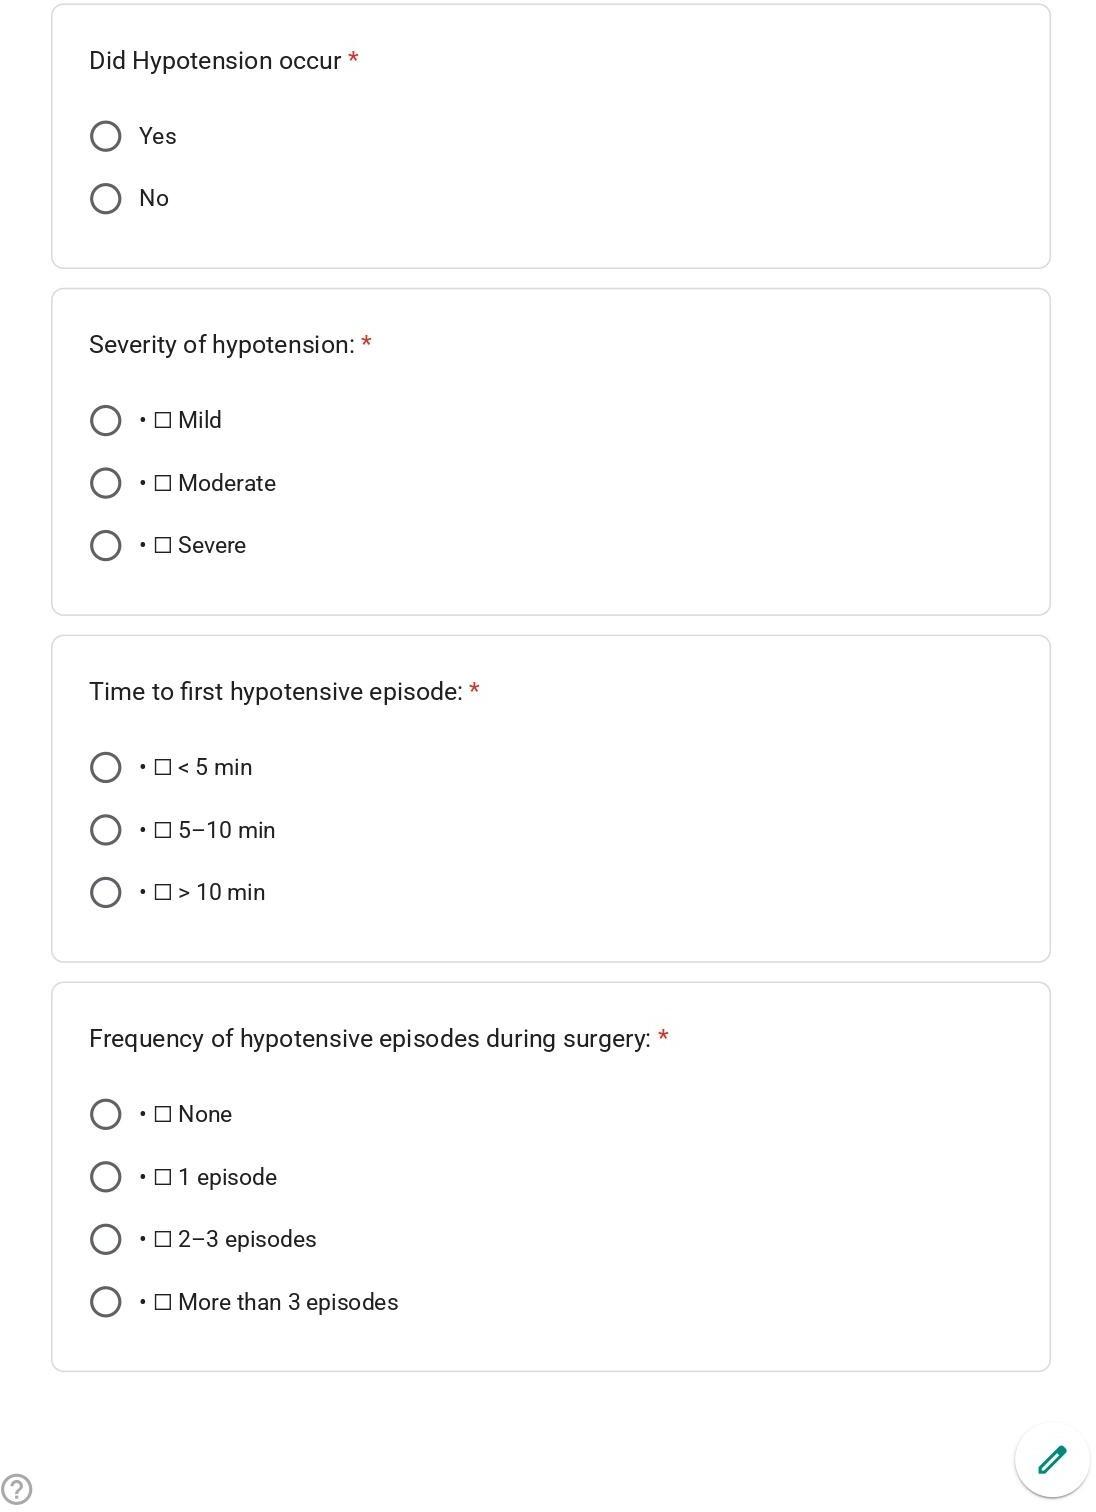


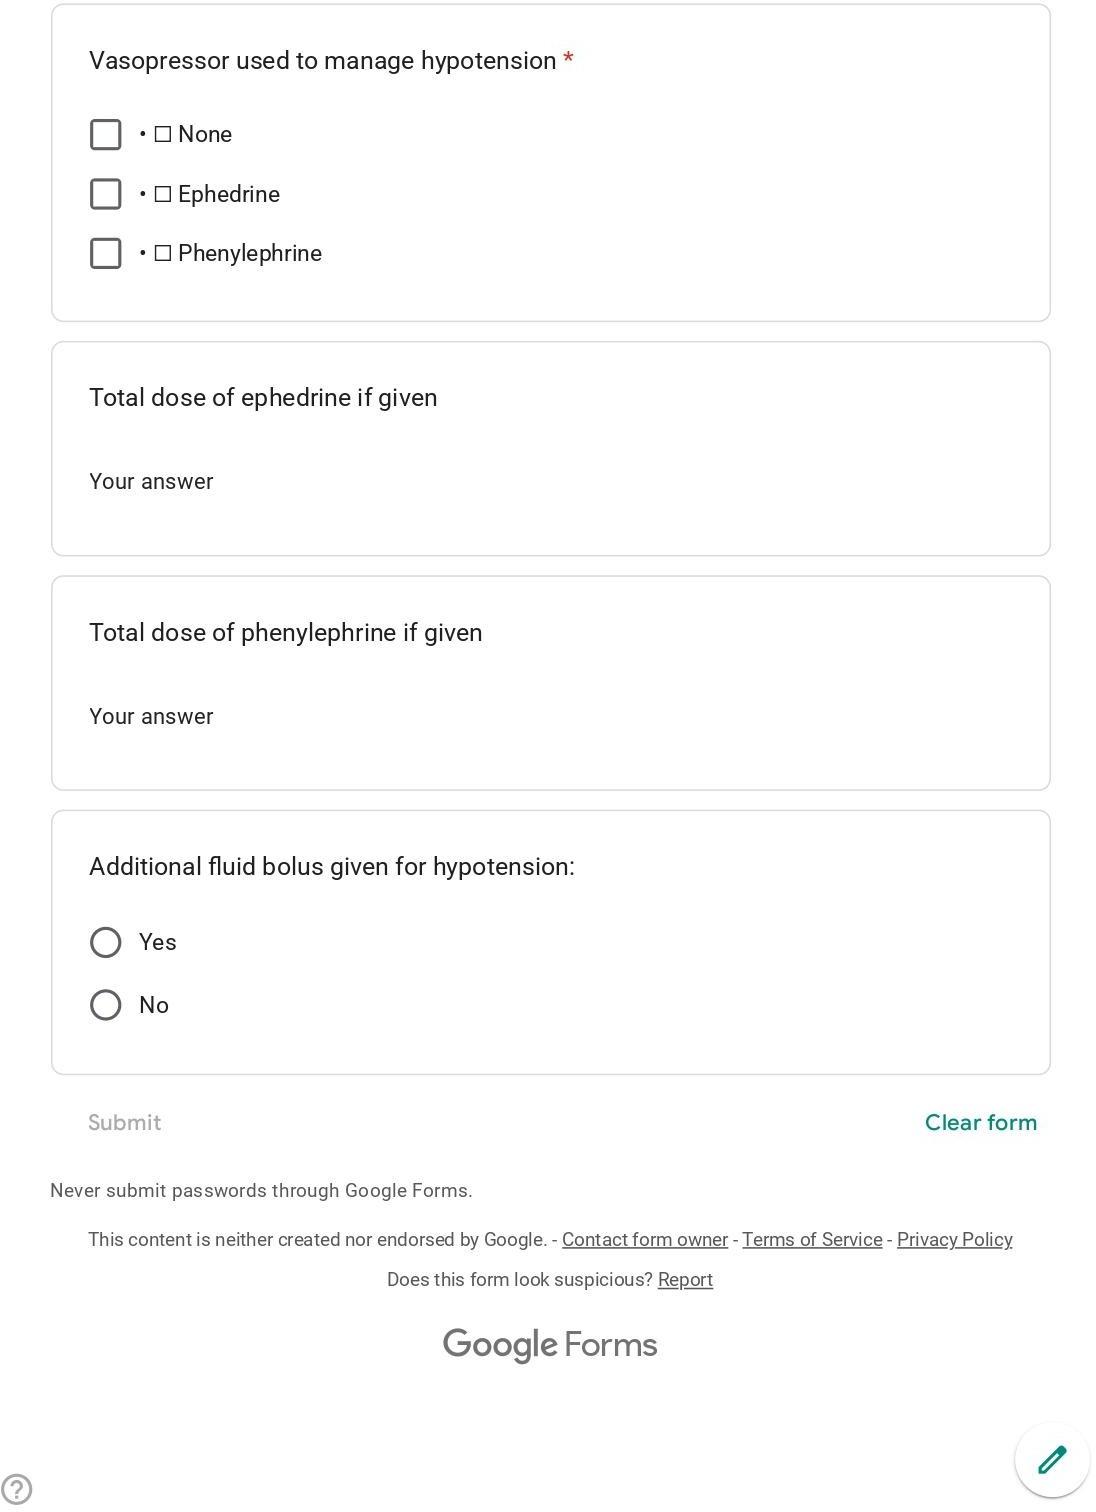


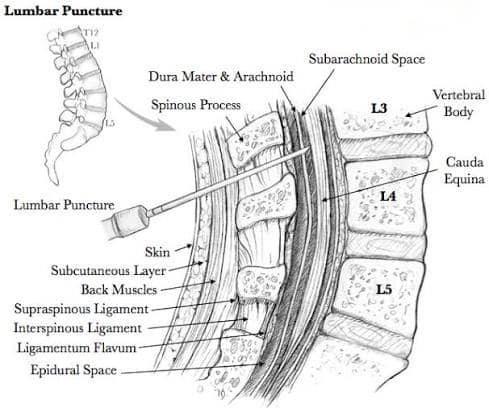


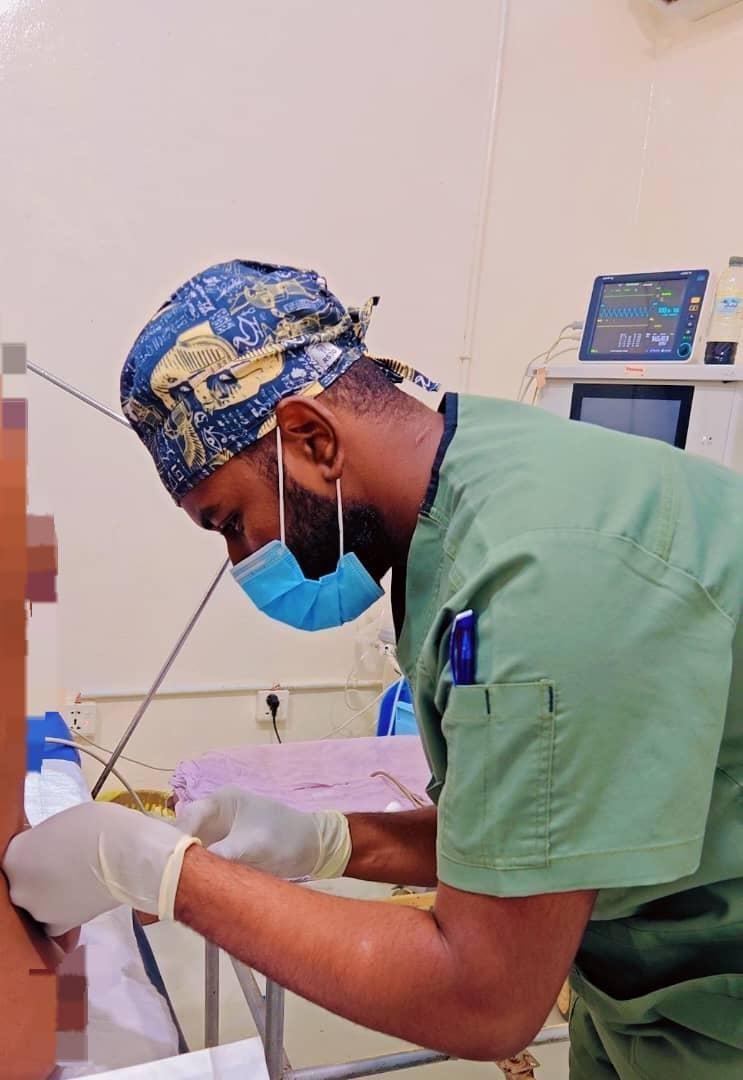

Supplement: Supplementary file 1 [file 88010b0cdcce45f2df9ecd3f.docx]
